# Supplementary material for: 1,4-Diazabicyclo[2.2.2]octane-based disalts showing non-centrosymmetric structures and phase transition behaviors
Source: Royal Society of Chemistry journal article supplement (doi:10.1039/c5ce02066b), 2016-01-01
Supplement: c5ce02066b1.pdf [file c5ce02066b1.pdf]

## Supporting information

### **1,4-Diazabicyclo[2.2.2]octane-based disalts showing non-centrosymmetric structures and phase transition behaviors**

Xiang-Bin Han, Pan Hu, Chao Shi, Wen Zhang\*

#### **Table of content**

**Figure S1** IR spectra of (a) **1** and **3** and (b) **2** and **4**.

**Figure S2** Raman spectra of (a) **1** and **3** and (b) **2** and **4**.

**Figure S3** Thermogravimetric analysis for (a) **1** and (b) **2**.

**Figure S4** PXRD of **1–4**.

**Figure S5** Dielectric spectra of **1–4**.

**Figure S6** Crystal orientations of **1** and **2**.

**Figure S7** Crystal morphologies of **1** and **2**.

**Table S1** Fractional coordinates ( $10^4$ ) and equivalent temperature factors ( $\text{\AA}^2 \cdot 10^3$ ) for  $\text{ClO}_4^-$  (233 K).

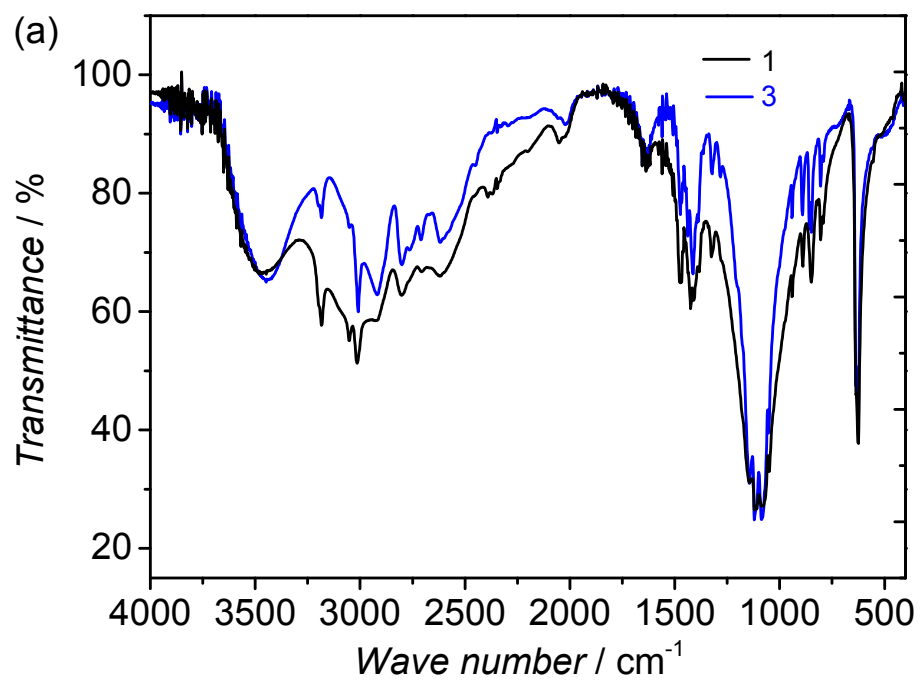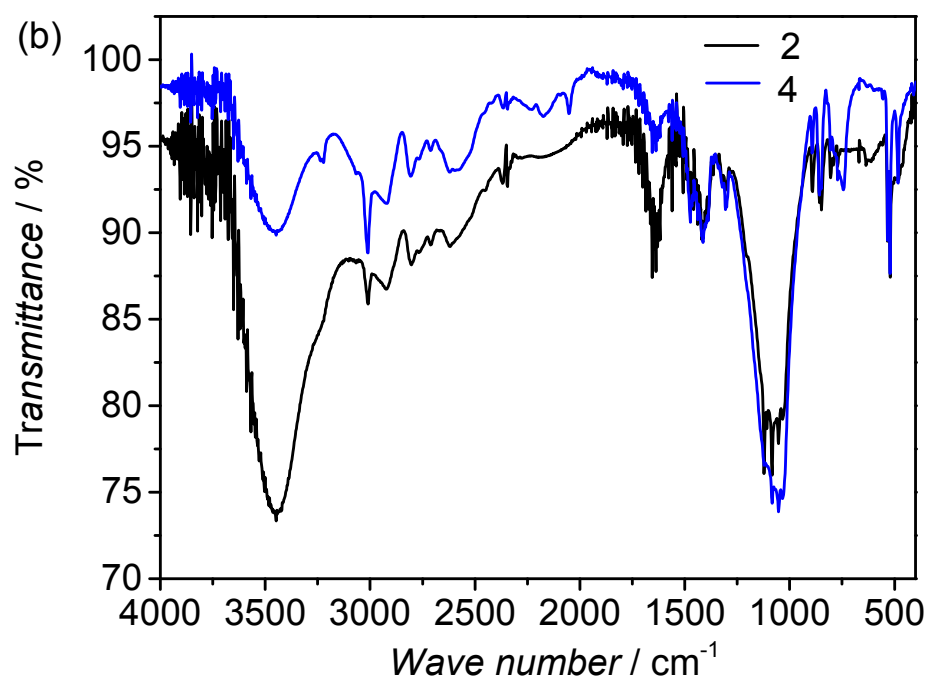

**Figure S1** IR spectra of (a) **1** and **3** and (b) **2** and **4**.

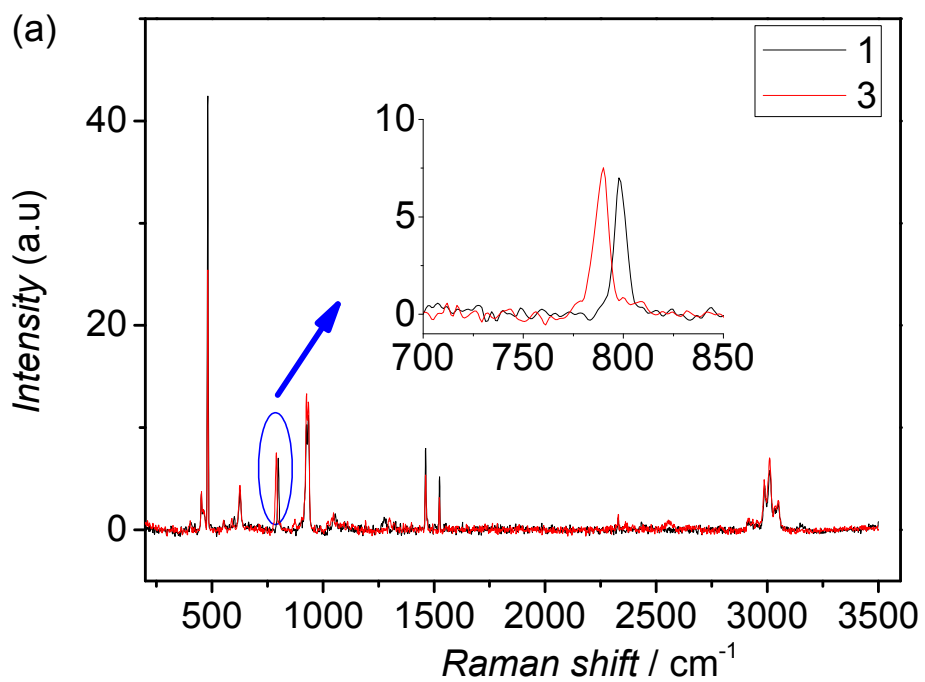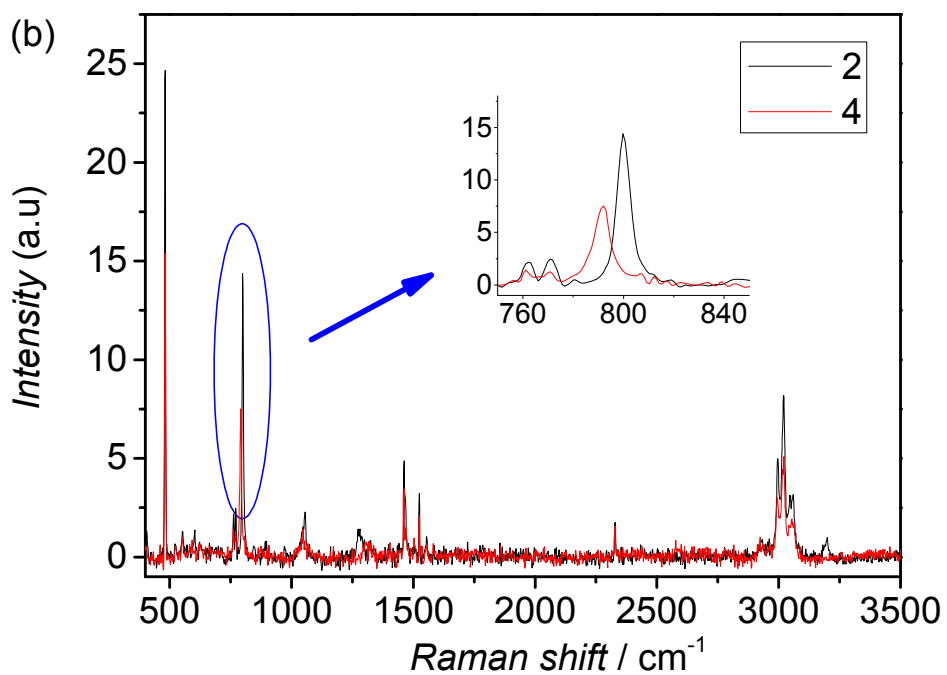

**Figure S2** Raman spectra of (a) 1 and 3 and (b) 2 and 4.

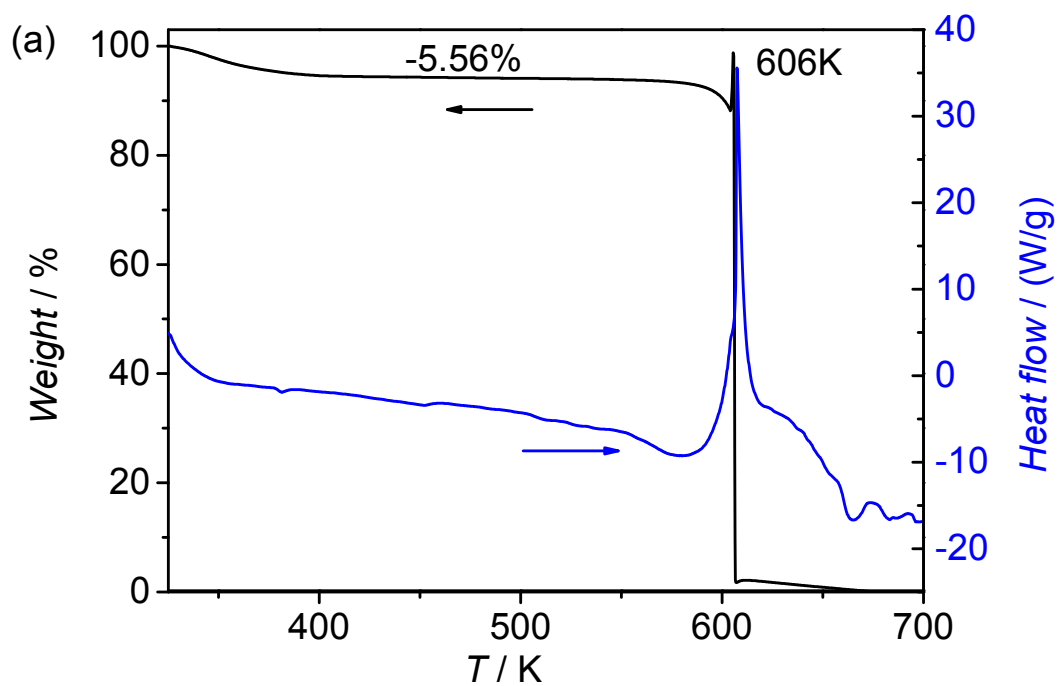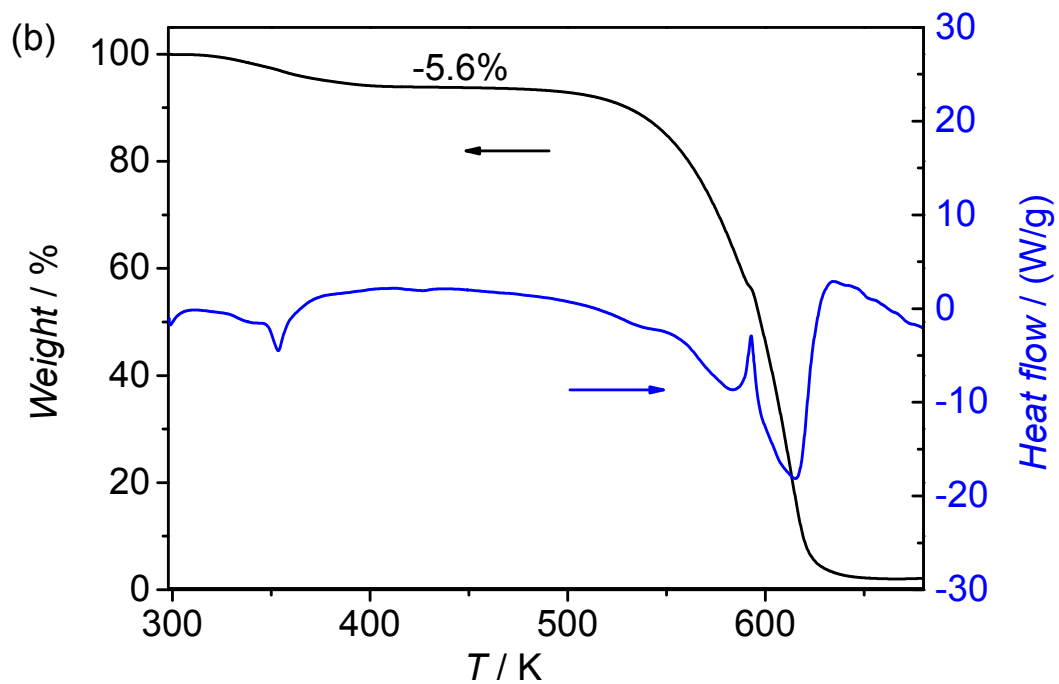

**Figure S3** Thermogravimetric analysis for (a) 1 and (b) 2.

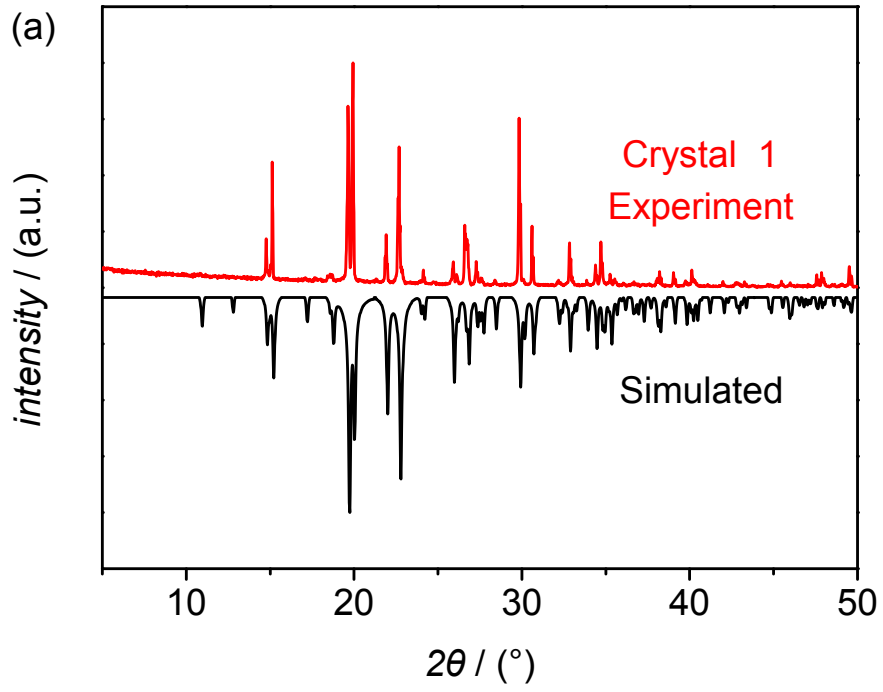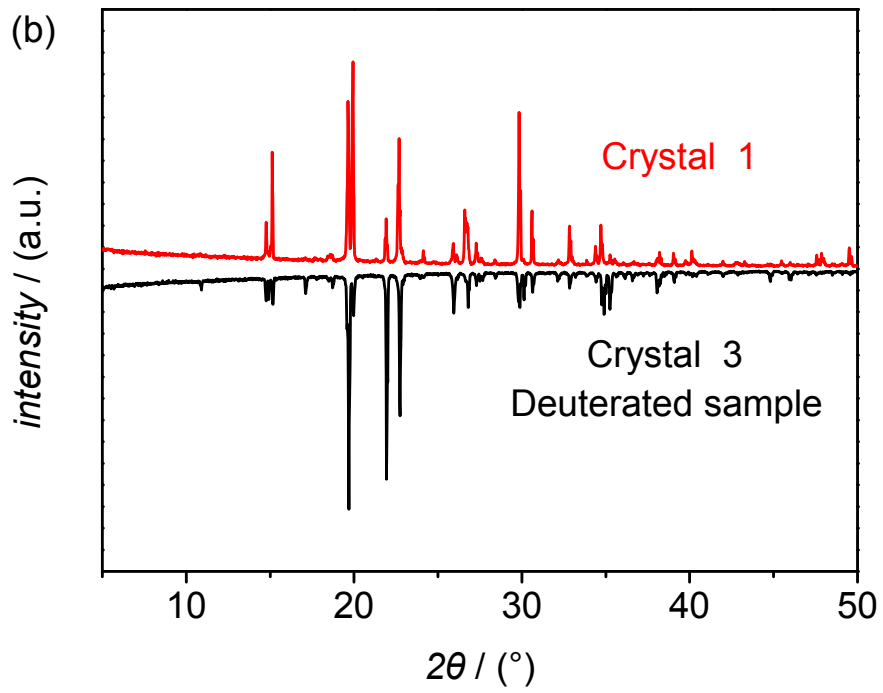

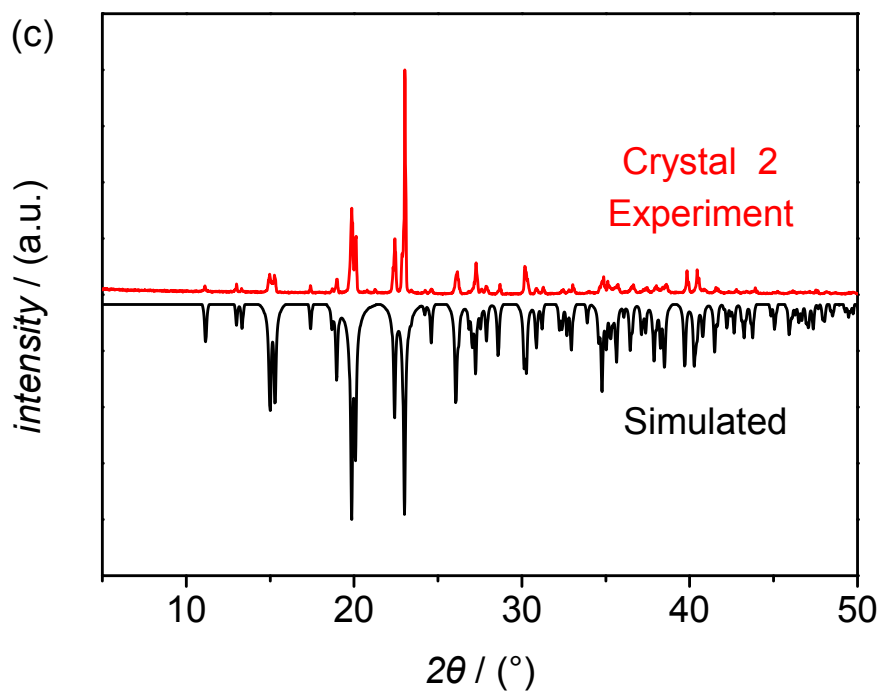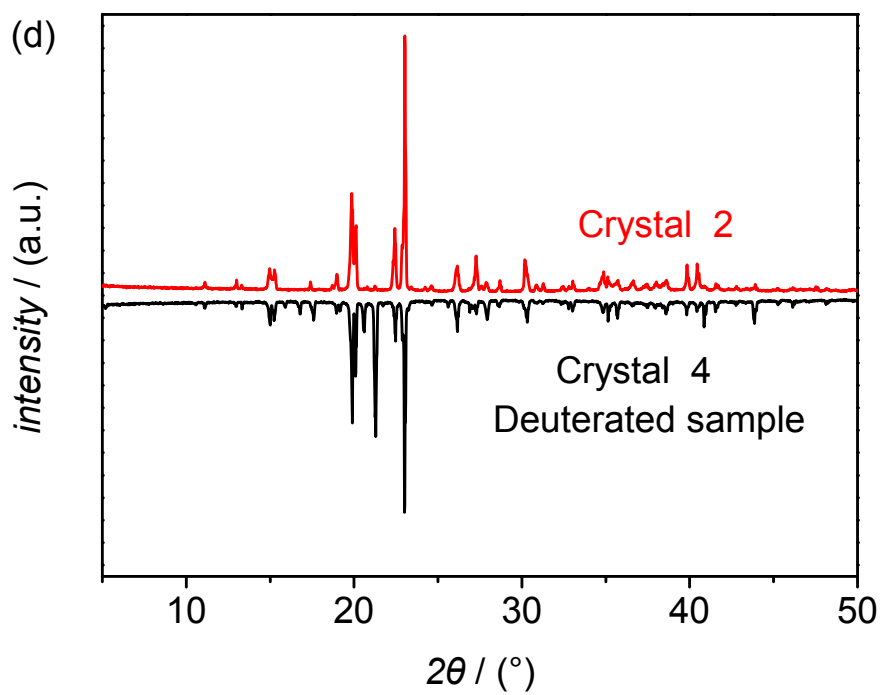

Figure S4 PXR D of 1–4.

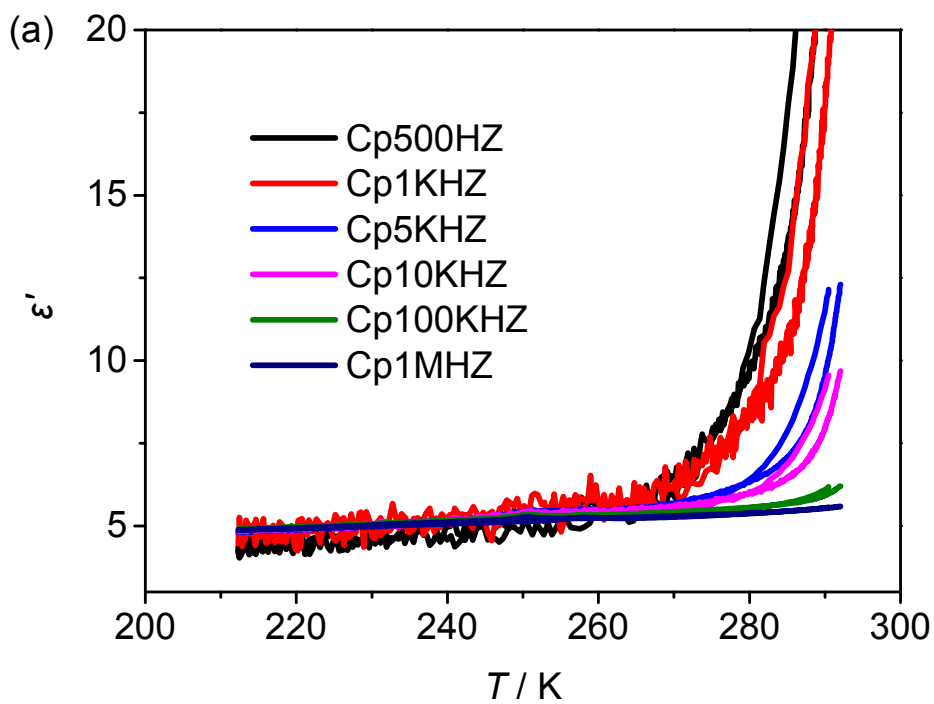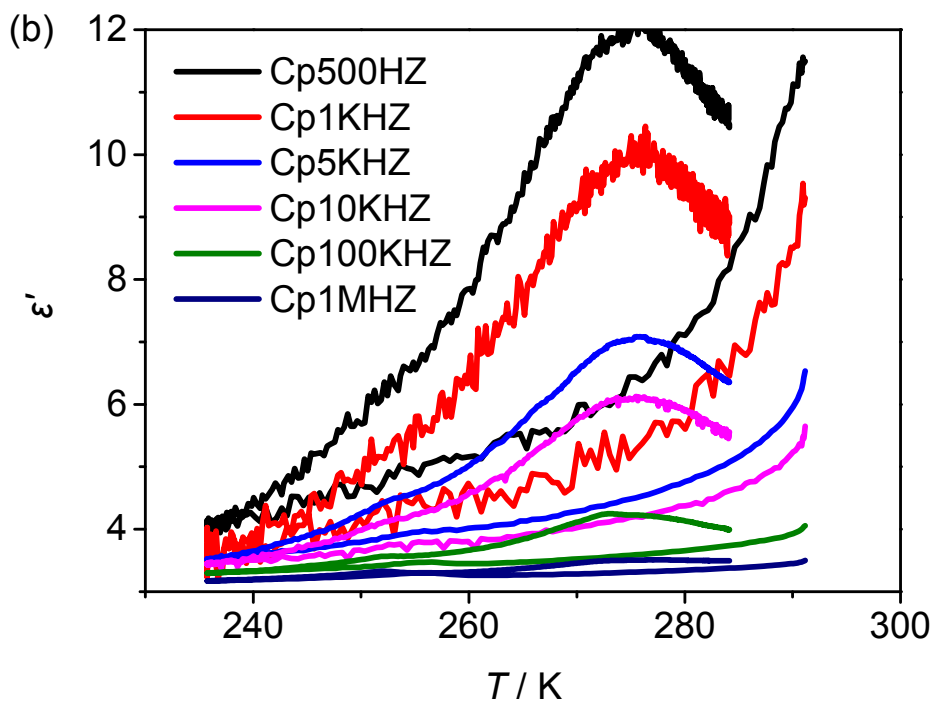

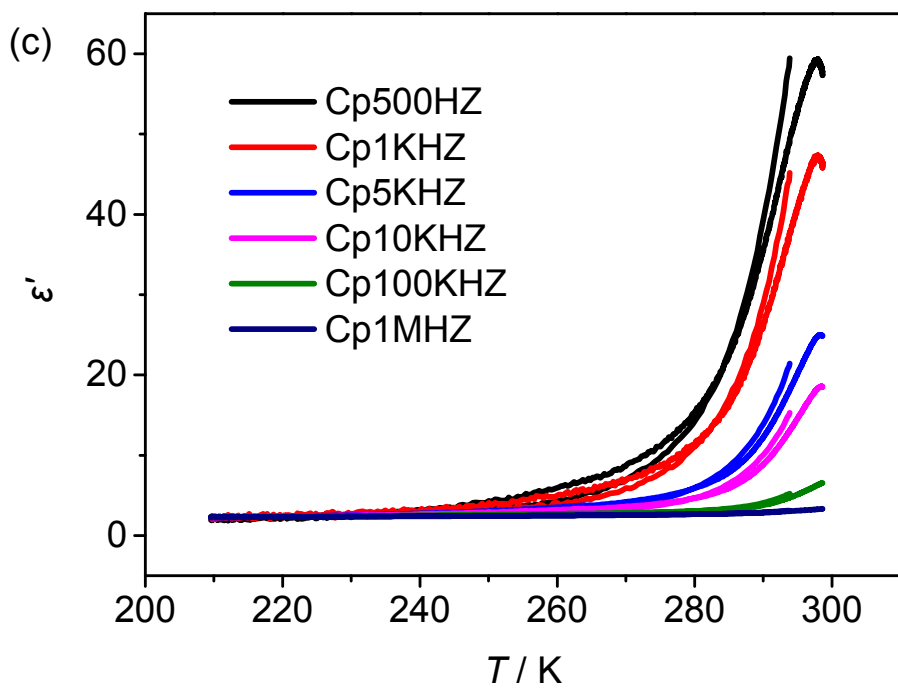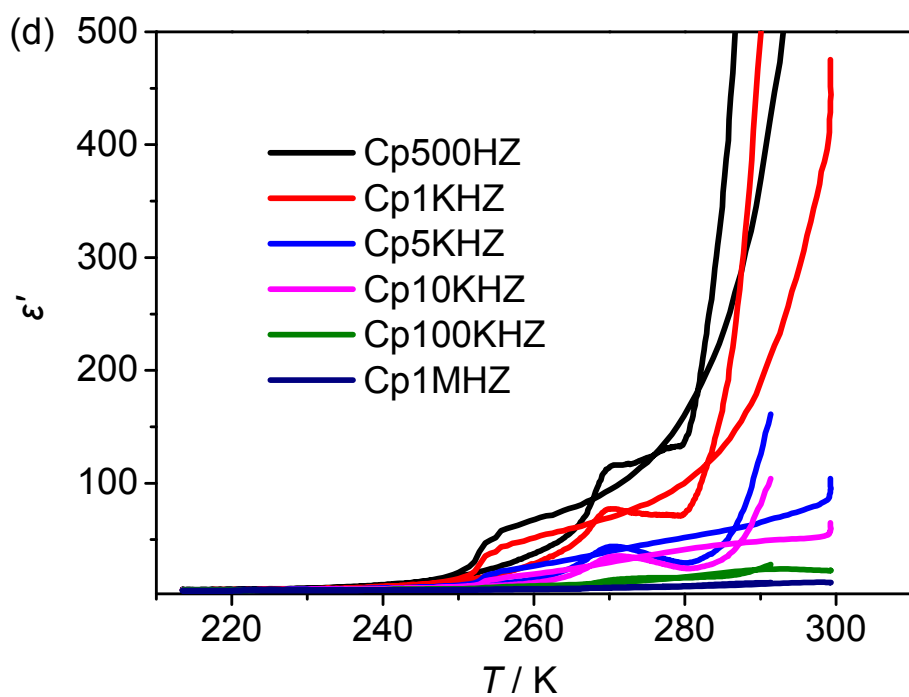

Figure S5 Dielectric spectra of 1–4.



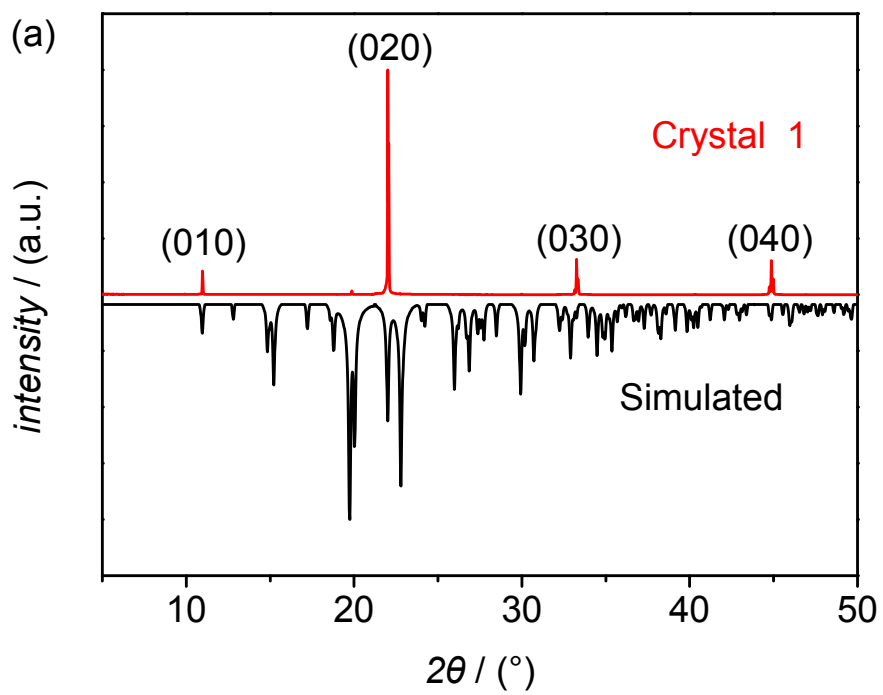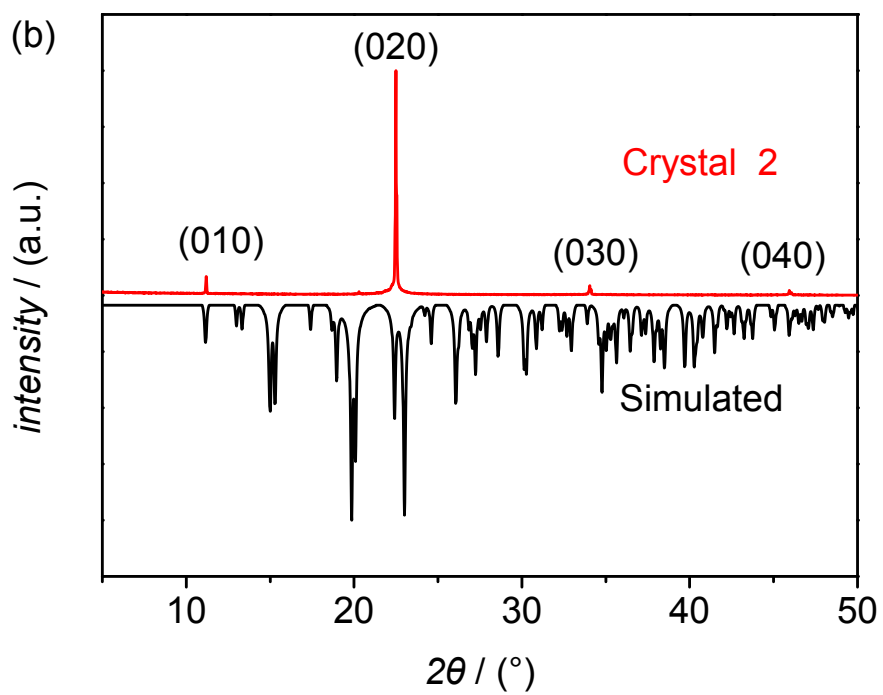

**Figure S6** Crystal orientations of 1 and 2.

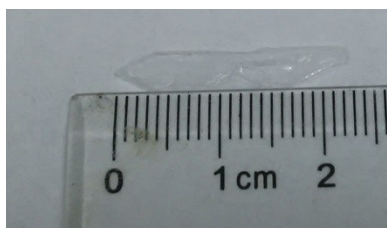

Crystal 1

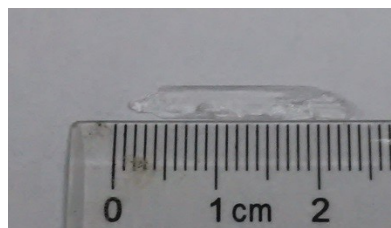

Crystal 2

**Figure S7** Crystal morphologies of **1** and **2**. The largest face of the crystals is the *b* face.

**Table S1** Fractional coordinates ( $10^4$ ) and equivalent temperature factors ( $\text{\AA}^2 \cdot 10^3$ ) for  $\text{ClO}_4^-$  (233 K).  $U_{\text{eq}}$  is defined as one-third of the trace of the orthogonalized  $U_{ij}$  tensor.

| ATOM | X        | Y       | Z       | $U_{\text{eq}}$ |
|------|----------|---------|---------|-----------------|
| O1   | 8795(3)  | 1997(5) | 3548(5) | 49(1)           |
| O2   | 7392(4)  | 3586(5) | 4105(5) | 61(1)           |
| O3   | 7482(4)  | 2498(6) | 2256(4) | 51(1)           |
| O4   | 7235(3)  | 728(5)  | 3812(4) | 45(1)           |
| O5   | 8655(5)  | 8633(7) | 2244(4) | 82(2)           |
| O6   | 9042(4)  | 7885(6) | 424(4)  | 51(1)           |
| O7   | 8695(6)  | 5838(7) | 1712(6) | 90(2)           |
| O8   | 10145(5) | 7333(9) | 1903(5) | 85(2)           |
